# Supplementary material
Source: Springer Nature journal article supplement (https://www.springermedizin.de/resource/supplementary/12874_2011_789_MOESM3_ESM.pdf/9432646)
Supplement: MOESM3 [file 9432646]



# CARE

## RESEARCH

- Symbiosis of care with research
- Participatory designs with equal and active input of all participants
- Intersubjective
- Support and supervision for participants
- Immediate and future benefits
- Culture open to research
